# Supplementary material for: The Role of Mycoplasma bovirhinis in the Development of Singular and Concomitant Respiratory Infections in Dairy Calves from Southern Brazil
Source: MDPI journal article supplement (doi:10.3390/pathogens13020114), 2024-01-26
Supplement: s1 [file s1]

# The participation of *Mycoplasma bovirhinis* in the development of singular and concomitant respiratory infections in dairy calves from Southern Brazil

Ana Paula Souza Frucchi<sup>1</sup>, Alais Maria Dall Agnol<sup>1</sup>, Eloiza Teles Caldart<sup>2</sup>, Dalton Everton Bronkhorst<sup>1</sup>, Alice Fernandes Alfieri<sup>1,3,4</sup>, Amauri Alcindo Alfieri<sup>1,3,4</sup> and Selwyn Arlington Headley<sup>3,4,5\*</sup>

<sup>1</sup> Laboratory of Animal Virology, Department of Preventive Veterinary Medicine, Universidade Estadual de Londrina, Paraná, Brazil.

<sup>2</sup> Laboratory of Protozoology and Parasitic Diseases, Department of Preventive Veterinary Medicine Universidade Estadual de Londrina, Paraná, Brazil.

<sup>3</sup> Multi-User Animal Health Laboratory (LAMSA), Department of Preventive Veterinary Medicine Universidade Estadual de Londrina, Paraná, Brazil.

<sup>4</sup> National Institute of Science and Technology for Dairy Production Chain (INCT-LEITE), Universidade Estadual de Londrina, Londrina, Brazil

<sup>5</sup> Laboratory of Animal Pathology, Department of Preventive Veterinary Medicine, Universidade Estadual de Londrina, Paraná, Brazil.

\* Correspondence: e-mail selwyn.headley@uel.br; Tel.: + 55 43 3371-4766

**Citation:** To be added by editorial staff during production.

Academic Editor: Firstname  
Lastname

Received: date

Revised: date

Accepted: date

Published: date

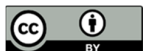

**Copyright:** © 2023 by the authors.  
Submitted for possible open access publication under the terms and conditions of the Creative Commons Attribution (CC BY) license (<https://creativecommons.org/licenses/by/4.0/>).

Supplementary Table 1. Targets genes, primers, and amplicon size of the molecular assays used to identify infectious disease pathogens of respiratory and enteric diseases of cattle.

| Pathogens                     | Target genes                             | Primer sequences (5' - 3')                                                         | Amplicon size (bp) | Reference order |
|-------------------------------|------------------------------------------|------------------------------------------------------------------------------------|--------------------|-----------------|
| <b>Viral</b>                  |                                          |                                                                                    |                    |                 |
| OvGHV2                        | Tegument protein                         | Fw-AGTCTGGGTATATGAATCCAGATGGCTCTC<br>Rv-AAGATAAGCACCAGTTATGCATCTGATAAA             | 422                | 1               |
| BoGHV6                        | DNA polymerase                           | Fw-ACAGACGGGCAGCAGATAAG<br>Rv-ATGGTTCGCCCCCTGTAGAGT                                | 551                | 2               |
| BCoV                          | N gene                                   | Fw-TTGCTAGTCTTGTCTGGC<br>Rv-TGTGGGTGCGAGTTCTGC                                     | 251                | 3               |
| BVDV                          | 5'UTR                                    | Fw-ATGCCC(T/A)TAGTAGGACTAGCA<br>Rv-TCAACTCCATGTGCCATGTAC                           | 288                | 4               |
| BRSV                          | G gene                                   | Fw-CATCAATCCAAAGCACCACACTGTC<br>Rv-GCTAGTTCTGTGGTGGATTGTTGTC                       | 371                | 5               |
| BoAHV1                        | C gene                                   | Fw-CAACCGAGACGGAAAGCTCC<br>Rv-AGTGCACGTACAGCGGCTCG                                 | 354                | 6               |
| BPIV-3                        | HN gene                                  | Fw-GAATGACTCATGATAGAGGTAT<br>Rv-AGGACAACCAGTTGTATTACAT<br>Rv-ATGTTGTTRATGATGGTGTGA | 647                | 7               |
| <b>Bacterial</b>              |                                          |                                                                                    |                    |                 |
| <i>Mannheimia haemolytica</i> | lktA-artJ intergenic region              | Fw-GTCCCTGTGTTTTTCATTATAAG<br>Rv-CACTCGATAATTATTCTAAATTAG                          | 385                | 8               |
| <i>Histophilus somni</i>      | 16S                                      | Fw-GAAGGCGATTAGTTTAAGAG<br>Rv-TTCGGGCACCAAGTRTTCA                                  | 408                | 9               |
| <i>Pasteurella multocida</i>  | ORF KMT1                                 | Fw-GCTGTAAACGAACTCGCCAC<br>Rv-ATCCGCTATTTACCCAGTGG                                 | 460                | 10              |
| <i>Mycoplasma bovis</i>       | 16S-23S rRNA internal transcribed spacer | Fw-GTACACTTGTCTTTTATCACTATA<br>Rv-AAGGTATCTCGCTTTATGTCCT                           | 488                | 11              |

## References

- 1 Baxter, S. I., Pow, I., Bridgen, A. & Reid, H. W. PCR detection of the sheep-associated agent of malignant catarrhal fever. *Arch Virol* **132**, 145-159 (1993). <https://doi.org/10.1007/bf01309849>
- 2 Oliveira, C. H. *et al.* Bovine herpesvirus 6 in buffaloes (*Bubalus bulalis*) from the Amazon region, Brazil. *Trop Anim Health Prod* **47**, 465-468 (2015). <https://doi.org/10.1007/s11250-014-0733-z>
- 3 Takiuchi, E., Stipp, D. T., Alfieri, A. F. & Alfieri, A. A. Improved detection of bovine coronavirus N gene in faeces of calves infected naturally by a semi-nested PCR assay and an internal control. *J Virol Methods* **131**, 148-154 (2006). <https://doi.org/10.1016/j.jviromet.2005.08.005>
- 4 Vilcek, S. *et al.* Pestiviruses isolated from pigs, cattle and sheep can be allocated into at least three genogroups using polymerase chain reaction and restriction endonuclease analysis. *Arch Virol* **136**, 309-323 (1994). <https://doi.org/10.1007/bf01321060>
- 5 Vilcek, S., Elvander, M., Ballagi-Pordány, A. & Belák, S. Development of nested PCR assays for detection of bovine respiratory syncytial virus in clinical samples. *J Clin Microbiol* **32**, 2225-2231 (1994). <https://doi.org/https://doi.org/10.1128/jcm.32.9.2225-2231.1994>
- 6 Claus, M. P. *et al.* Rapid detection and differentiation of bovine herpesvirus 1 and 5 glycoprotein C gene in clinical specimens by multiplex-PCR. *J Virol Methods* **128**, 183-188 (2005). <https://doi.org/10.1016/j.jviromet.2005.05.001>
- 7 Zhu, Y. M. *et al.* Isolation and genetic characterization of bovine parainfluenza virus type 3 from cattle in China. *Vet Microbiol* **149**, 446-451 (2011). <https://doi.org/10.1016/j.vetmic.2010.11.011>
- 8 Angen, O. *et al.* Respiratory disease in calves: microbiological investigations on trans-tracheally aspirated bronchoalveolar fluid and acute phase protein response. *Vet Microbiol* **137**, 165-171 (2009). <https://doi.org/10.1016/j.vetmic.2008.12.024>
- 9 Angen, O., Ahrens, P. & Tegtmeier, C. Development of a PCR test for identification of *Haemophilus somnus* in pure and mixed cultures. *Vet Microbiol* **63**, 39-48 (1998). [https://doi.org/https://doi.org/10.1016/s0378-1135\(98\)00222-3](https://doi.org/https://doi.org/10.1016/s0378-1135(98)00222-3)
- 10 Townsend, K. M., Frost, A. J., Lee, C. W., Papadimitriou, J. M. & Dawkins, H. J. Development of PCR assays for species- and type-specific identification of *Pasteurella multocida* isolates.

*Journal of clinical microbiology* **36**, 1096-1100 (1998). <https://doi.org/10.1128/jcm.36.4.1096-1100.1998>

- 11 Voltarelli, D. C. *et al.* A nested-PCR strategy for molecular diagnosis of mollicutes in uncultured biological samples from cows with vulvovaginitis. *Anim Reprod Sci* **188**, 137-143 (2018).  
<https://doi.org/https://doi.org/10.1016/j.anireprosci.2017.11.018>
